# Supplementary material for: The Association of Socioeconomic and Lifestyle Factors with the Oral Health Status in School-Age Children from Pakistan: A Cross-Sectional Study
Source: MDPI journal article supplement (doi:10.3390/healthcare11050756), 2023-03-04
Supplement: s1 [file s1]

**Supplementary Table S1: Post hoc analysis of dependent and independent variables in this study (n=359)**

| Dependent variables                                                              | Comparisons                | Adjusted <i>p</i> value | <i>p</i> -value |
|----------------------------------------------------------------------------------|----------------------------|-------------------------|-----------------|
| <b>Gender</b><br>(Male, Female)                                                  | Male vs BT < 1 minute      | 0.36812                 | 0.006*          |
|                                                                                  | Male vs BT 2-3 minutes     | 0.68916                 |                 |
|                                                                                  | Male vs BT > 2-3 minutes   | 0.92034                 |                 |
|                                                                                  | Male vs BT <2-3 minutes    | 0.61708                 |                 |
|                                                                                  | Female vs BT < 1 minute    | 0.36812                 |                 |
|                                                                                  | Female vs BT 2-3 minutes   | 0.68916                 |                 |
|                                                                                  | Female vs BT > 2-3 minutes | 0.92034                 |                 |
|                                                                                  | Female vs BT < 2-3 minutes | 0.61708                 |                 |
|                                                                                  | Male vs BF once a day      | 0.00067*                | 0.008*          |
|                                                                                  | Male vs BF twice a day     | 0.00067*                |                 |
|                                                                                  | Male vs BF thrice a day    | 0.84148                 |                 |
|                                                                                  | Female vs BF once a day    | 0.00067*                |                 |
|                                                                                  | Female vs BF twice a day   | 0.00067*                |                 |
|                                                                                  | Female vs BF thrice a day  | 0.84148                 |                 |
| <b>Level of maternal education</b><br>(Educated, Un educated)                    | Edu vs BT < 1 minute       | 0.31731                 | 0.006*          |
|                                                                                  | Edu vs BT 2-3 minutes      | 0.10960                 |                 |
|                                                                                  | Edu vs BT > 2-3 minutes    | 0.00097                 |                 |
|                                                                                  | Edu vs BT < 2-3 minutes    | 0.16151                 |                 |
|                                                                                  | Un Edu vs BT < 1 minute    | 0.31731                 |                 |
|                                                                                  | Un Edu vs BT 2-3 minutes   | 0.10960                 |                 |
|                                                                                  | Un Edu vs BT > 2-3 minutes | 0.00097*                |                 |
|                                                                                  | Un Edu vs BT < 2-3 minutes | 0.16151                 |                 |
| <b>Physical Activity</b><br>(everyday, once a week, twice a week, rarely, never) | Everyday vs PSP            | 0.36812                 | 0.005*          |
|                                                                                  | Everyday vs PSA            | 0.36812                 |                 |
|                                                                                  | OW vs PSP                  | 0.92034                 |                 |
|                                                                                  | OW vs PSA                  | 0.92034                 |                 |
|                                                                                  | TW vs PSP                  | 0.76418                 |                 |
|                                                                                  | TW vs PSA                  | 0.76418                 |                 |
|                                                                                  | Rarely vs PSP              | 0.19360                 |                 |
|                                                                                  | Rarely vs PSA              | 0.19360                 |                 |
|                                                                                  | Never vs PSP               | 0.01640                 |                 |
|                                                                                  | Never vs PSA               | 0.01640                 |                 |

|                                                                                                 |                                     |          |        |
|-------------------------------------------------------------------------------------------------|-------------------------------------|----------|--------|
| <b>Physical Activity</b><br>(everyday, once a week, twice a week, rarely, never)                | <i>Everyday vs Sugary Drink</i>     | 0.27133  | 0.003* |
|                                                                                                 | <i>Everyday vs Non-Sugary Drink</i> | 0.23014  |        |
|                                                                                                 | <i>Everyday vs Both</i>             | 0.61708  |        |
|                                                                                                 | <i>OW vs Sugary Drink</i>           | 0.36812  |        |
|                                                                                                 | <i>OW vs Non-Sugary Drink</i>       | 0.48393  |        |
|                                                                                                 | <i>OW vs Both</i>                   | 0.42371  |        |
|                                                                                                 | <i>TW vs Sugary Drink</i>           | 0.13361  |        |
|                                                                                                 | <i>TW vs Non-Sugary Drink</i>       | 0.10960  |        |
|                                                                                                 | <i>TW vs Both</i>                   | 0.61708  |        |
|                                                                                                 | <i>Rare vs Sugary Drink</i>         | 0.68916  |        |
|                                                                                                 | <i>Rare vs Non-Sugary Drink</i>     | 0.36812  |        |
|                                                                                                 | <i>Rare vs Both</i>                 | 0.00137* |        |
|                                                                                                 | <i>Never vs Sugary Drink</i>        | 0.13361  |        |
|                                                                                                 | <i>Never vs Non-Sugary Drink</i>    | 0.19360  |        |
|                                                                                                 | <i>Never vs Both</i>                | 0.42371  |        |
| <b>Physical Activity vs Absenteeism</b><br>(everyday, once a week, twice a week, rarely, never) | <i>Everyday vs yes</i>              | 0.00373* | 0.005* |
|                                                                                                 | <i>Everyday vs Never</i>            | 0.00373* |        |
|                                                                                                 | <i>OW vs Yes</i>                    | 0.16151  |        |
|                                                                                                 | <i>OW vs Never</i>                  | 0.16151  |        |
|                                                                                                 | <i>TW vs Yes</i>                    | 0.07186  |        |
|                                                                                                 | <i>TW vs Never</i>                  | 0.07186  |        |
|                                                                                                 | <i>Rarely vs Yes</i>                | 0.02145  |        |
|                                                                                                 | <i>Rarely vs Never</i>              | 0.48393  |        |
|                                                                                                 | <i>Never vs yes</i>                 | 0.48393  |        |
|                                                                                                 | <i>Never vs Never</i>               | 0.54851  |        |
|                                                                                                 |                                     |          |        |
| <b>Self-care oral health</b><br>(good, average, poor)                                           | <i>Good vs Yes</i>                  | 0.08913  | 0.008* |
|                                                                                                 | <i>Good vs Never</i>                | 0.00693* |        |
|                                                                                                 | <i>Average vs Yes</i>               | 0.00693* |        |
|                                                                                                 | <i>Average vs Never</i>             | 0.07186  |        |
|                                                                                                 | <i>Poor vs Yes</i>                  | 0.07186  |        |
|                                                                                                 | <i>Poor vs Never</i>                | 0.84148  |        |
| <b>Grades</b><br>(Class I,II, III, IV, V, VI, VII, VIII, IX)                                    | <i>Class I vs BF once a day</i>     | 0.23014  | 0.001* |
|                                                                                                 | <i>Class I vs BF twice a day</i>    | 0.27133  |        |
|                                                                                                 | <i>Class I vs BF thrice a day</i>   | 0.31731  |        |
|                                                                                                 | <i>Class II vs BF once a day</i>    | 0.23014  |        |
|                                                                                                 | <i>Class II vs BF twice a day</i>   | 0.31731  |        |
|                                                                                                 | <i>Class II vs BF thrice a day</i>  | 0.54851  |        |
|                                                                                                 | <i>Class III vs BF once a day</i>   | 0.48393  |        |

|  |                                      |          |  |
|--|--------------------------------------|----------|--|
|  | <i>Class III vs BF twice a day</i>   | 0.42371  |  |
|  | <i>Class III vs BF thrice a day</i>  | 0.76418  |  |
|  | <i>Class IV vs BF once a day</i>     | 0.00511* |  |
|  | <i>Class IV vs BF twice a day</i>    | 0.01242  |  |
|  | <i>Class IV vs BF thrice a day</i>   | 0.03573  |  |
|  | <i>Class V vs BF once a day</i>      | 0.84148  |  |
|  | <i>Class V vs BF twice a day</i>     | 0.84148  |  |
|  | <i>Class V vs BF thrice a day</i>    | 0.68916  |  |
|  | <i>Class VI vs BF once a day</i>     | 0.36812  |  |
|  | <i>Class VI vs BF twice a day</i>    | 0.31731  |  |
|  | <i>Class VI vs BF thrice a day</i>   | 0.84148  |  |
|  | <i>Class VII vs BF once a day</i>    | 0.01640  |  |
|  | <i>Class VII vs BF twice a day</i>   | 0.01640  |  |
|  | <i>Class VII vs BF thrice a day</i>  | 0.76418  |  |
|  | <i>Class VIII vs BF once a day</i>   | 0.36812  |  |
|  | <i>Class VIII vs BF twice a day</i>  | 0.36812  |  |
|  | <i>Class VIII vs BF thrice a day</i> | 0.92034  |  |
|  | <i>Class IX vs BF once a day</i>     | 0.54851  |  |
|  | <i>Class IX vs BF twice a day</i>    | 0.48393  |  |
|  | <i>Class IX vs BF thrice a day</i>   | 0.42371  |  |

\*Significant p-value, BT=brushing time, Edu=educated, Un edu= uneducated, PSP=physical activity present, PSA= physical activity absent, OW=once a day, TW=twice a day
